# Supplementary material
Source: PubMed Central journal article supplement (PMC6094126)
Supplement: pnas.1802326115.sapp.pdf [file pnas.1802326115.sapp.pdf]

## Supplementary Information for

The RNA triphosphatase DUSP11 enables XRN-mediated restriction of hepatitis C virus

Rodney P. Kincaid, Victor L. Lam, Rachel P. Chirayil, Glenn Randall, Christopher S. Sullivan

Christopher S. Sullivan  
Email: [chris\\_sullivan@austin.utexas.edu](mailto:chris_sullivan@austin.utexas.edu)

### **This PDF file includes:**

Supplementary text  
Figs. S1 to S6  
Table S1

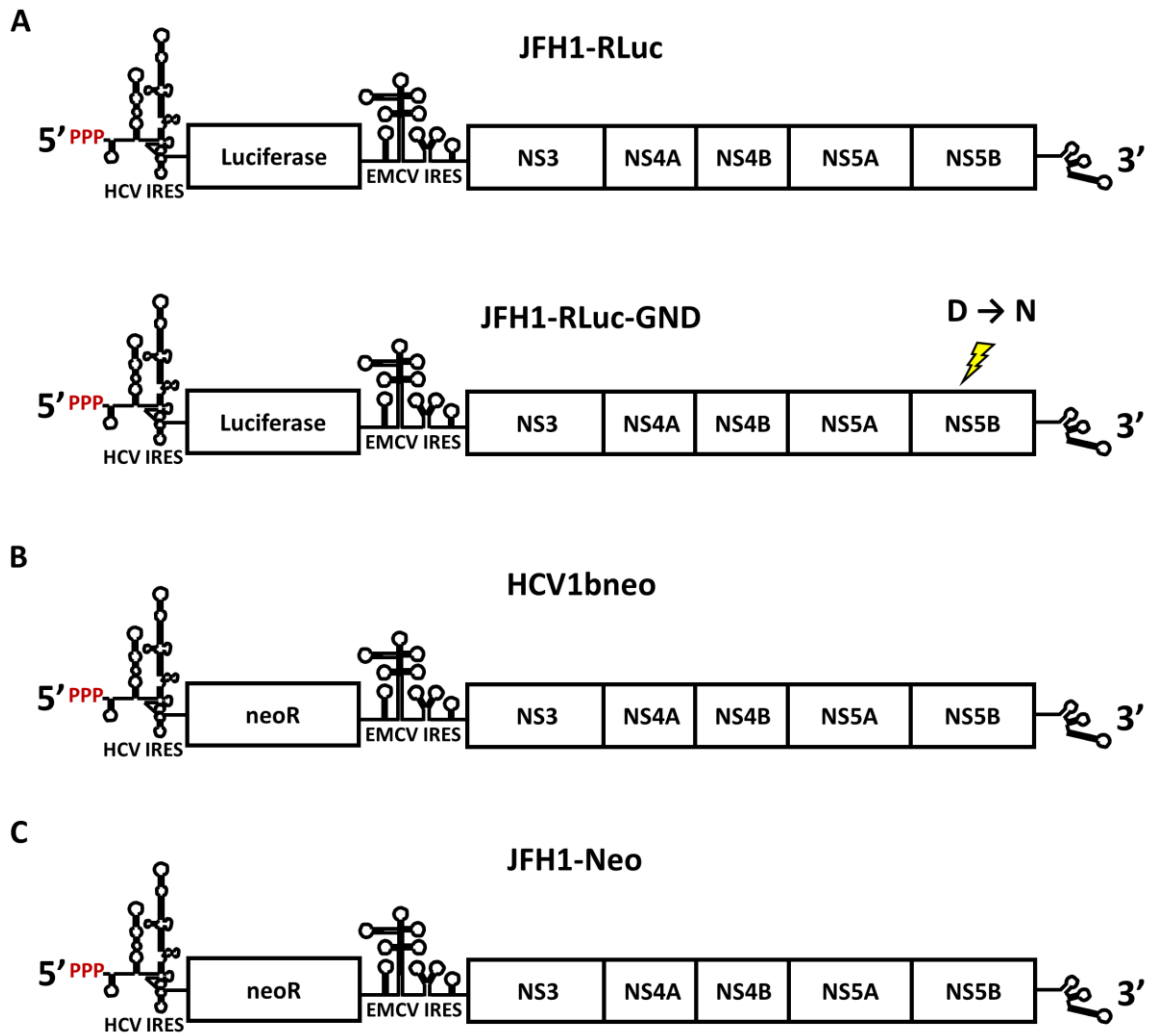

**Figure S1. Schematics of HCV subgenomic replicons used in this study.**

- A. Schematic of JFH1 based *Renilla* luciferase subgenomic replicons. The JFH1-RLuc-GND bears a point mutation resulting in a single amino acid change in the virally encoded RNA dependent RNA polymerase rendering it inactive.
- B. Schematic of neomycin resistance encoding subgenomic replicon maintained in GS4.1 cells.
- C. Schematic of JFH1 neomycin resistance encoding subgenomic replicon.

**A**

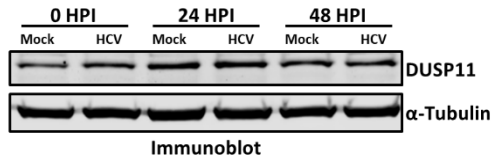

**Figure S2. Immunoblot analysis of DUSP11 in HCV infected Huh7 cells.**

- A. Total protein was harvested from either HCVcc infected (HCV) or mock infected (Mock) Huh7 cells. Equal volumes of cell lysate was separated by SDS-PAGE and probed with the indicated antibodies.

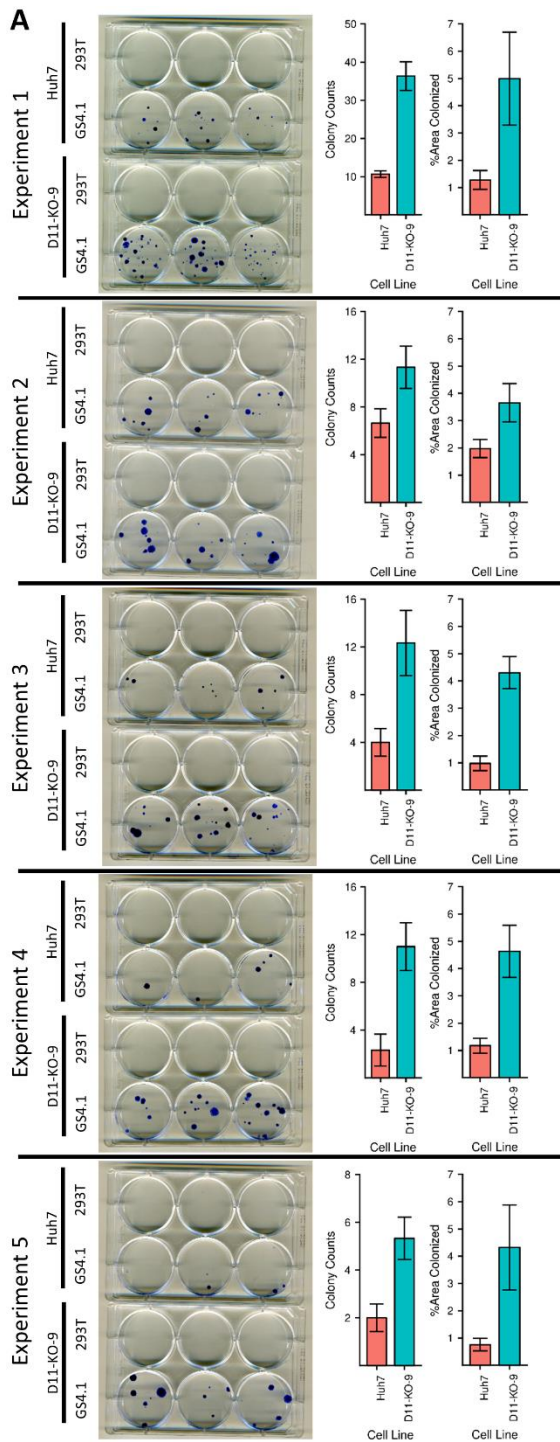

**Figure S3. GS4.1 replicon colony formation assays in parental Huh7 cells and DUSP11 knockout cells (D11-KO-9).**

A. Quantitation of area colonized and number of colonies with transfection of GS4.1 RNA is presented to the right of each experiments plates.

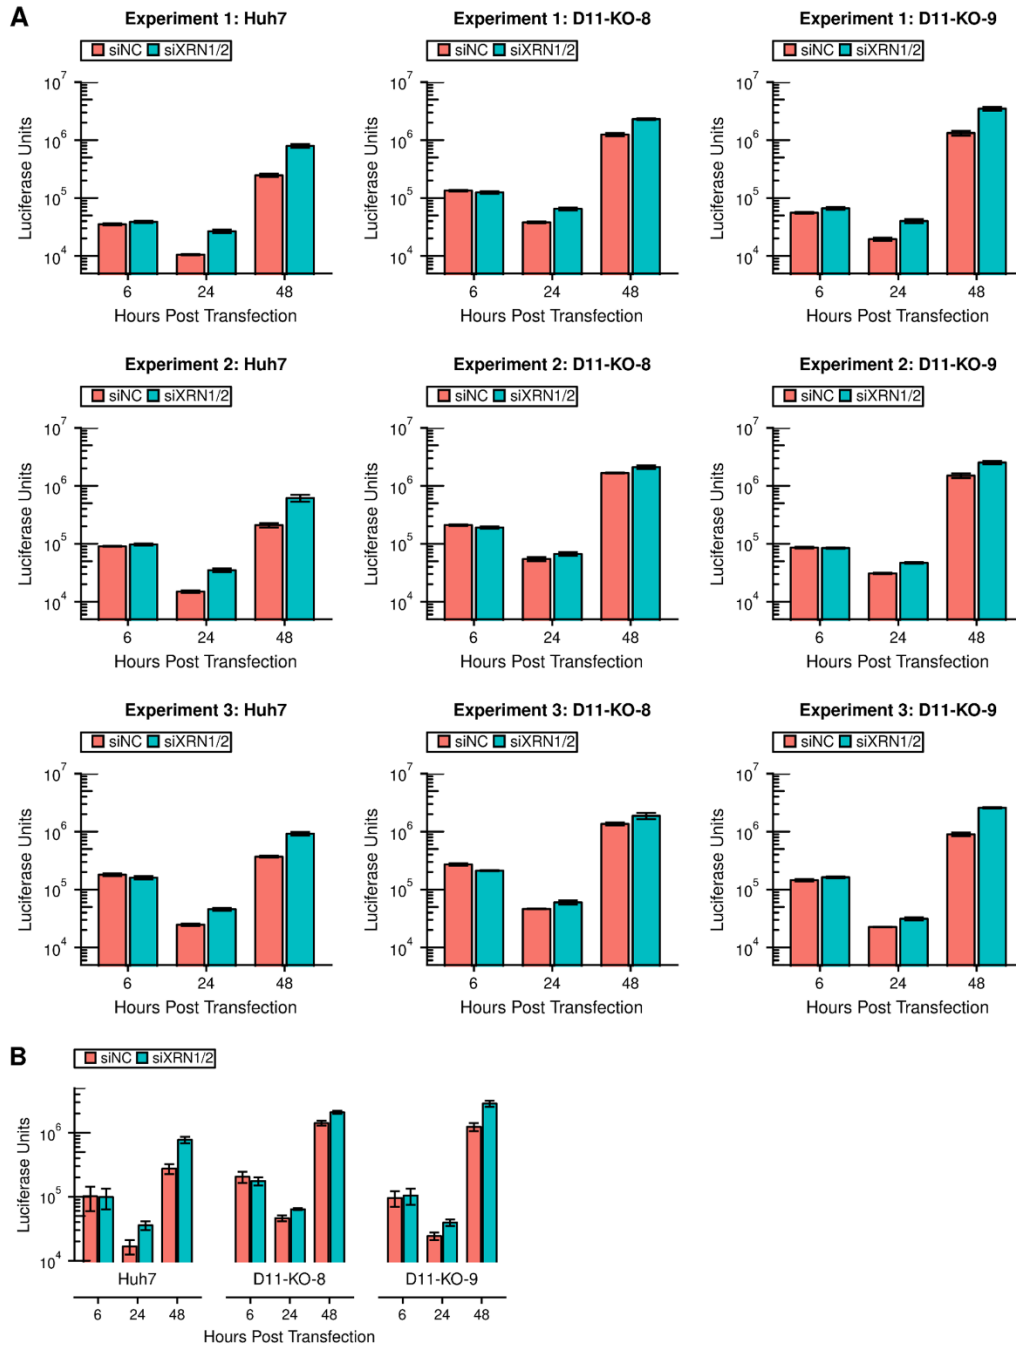

**Figure S4. Raw un-normalized luciferase expression data for XRN siRNA replicon experiments in Figure 2C.**

- A. sgJFH1-RLuc replicon luciferase assay in parental Huh7 cells and two independent DUSP11 knockout clones (D11-KO-8 and D11-KO-9) treated with irrelevant control siRNA (siNC) or a pool of XRN1 and XRN2 specific siRNAs (siXRNs). Luciferase assays were performed at the indicated times post replicon RNA transfection. The un-normalized luciferase expression for each experiment is presented separately as the mean  $\pm$  SEM of the three wells assayed per condition.
- B. Un-normalized means  $\pm$  SEM derived from the three experiments in panel A.

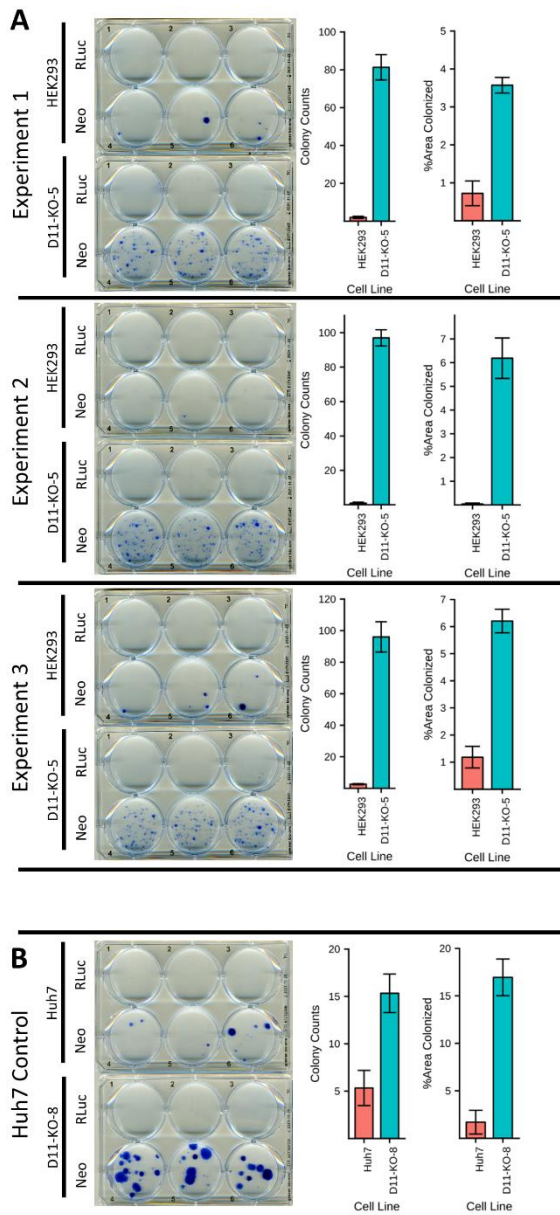

**Figure S5. JFH1-Neo replicon colony formation assays in parental cells and DUSP11 knockout cells.**

- A. Quantitation of area colonized and number of colonies with transfection of *in vitro* transcribed JFH1-Neo RNA into HEK293 or HEK293-D11-KO-5 cells is presented to the right of each experiment's plates.
- B. Quantitation of area colonized and number of colonies with transfection of *in vitro* transcribed JFH1-Neo RNA into Huh7 or Huh7-D11-KO-8 is presented to the right of each experiments plates.

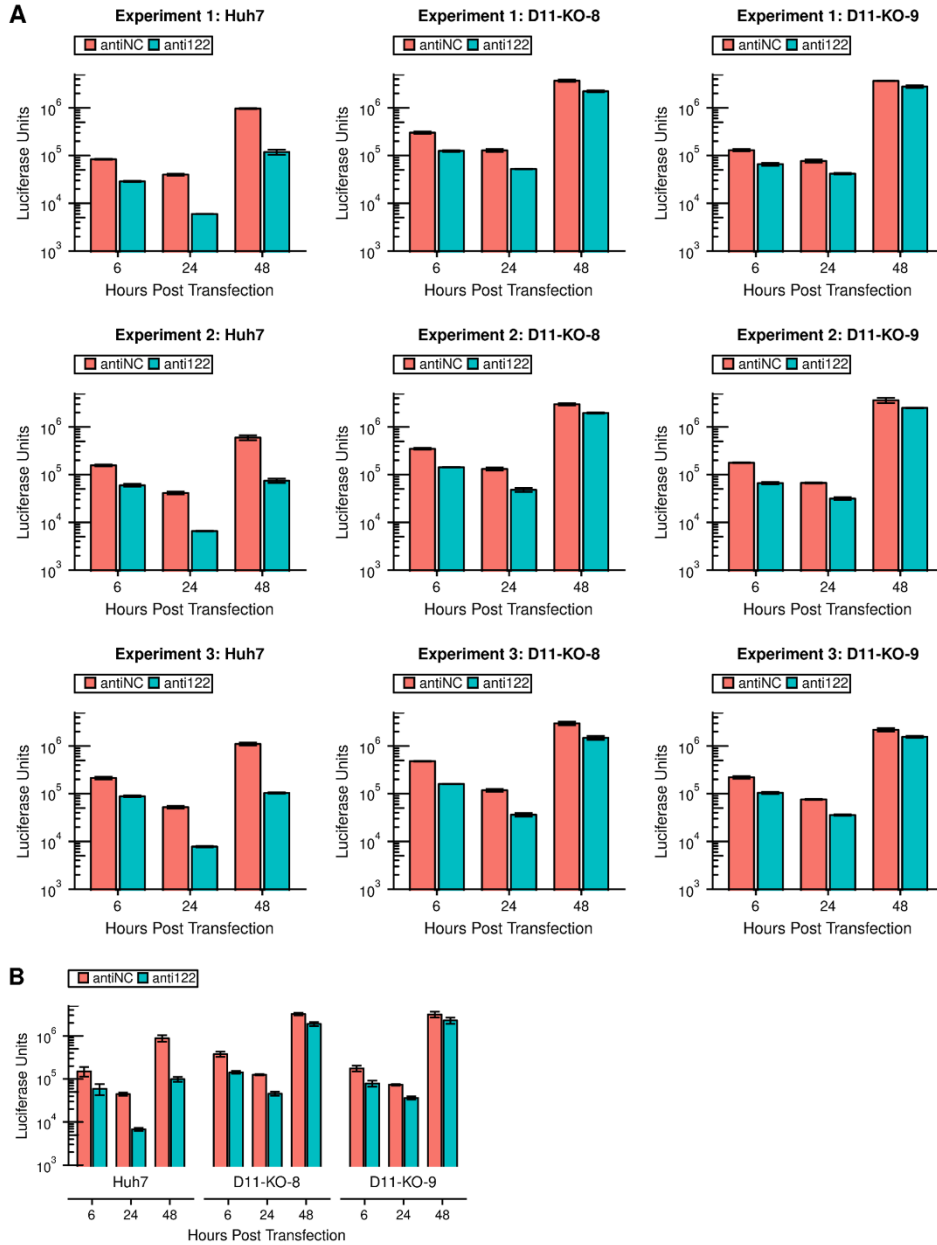

**Figure S6. Raw un-normalized luciferase expression data for miR-122 antimir replicon experiments in Figure 3B.**

- A. sgJFH1-RLuc replicon luciferase assay in parental Huh7 cells and two independent DUSP11 knockout clones (D11-KO-8 and D11-KO-9) treated with irrelevant control anti-miR (antiNC) or miR-122 specific anti-miR (anti122). Luciferase assays were performed at the indicated times post replicon RNA transfection. The un-normalized luciferase expression for each experiment is presented separately as the mean  $\pm$  SEM of the three wells assayed per condition.
- B. Un-normalized means  $\pm$  SEM derived from the three experiments in panel A.

| Sequence Name   | Sequence                                                                                                                                                                                                                                                                                                                                                                                                                                                                                           |
|-----------------|----------------------------------------------------------------------------------------------------------------------------------------------------------------------------------------------------------------------------------------------------------------------------------------------------------------------------------------------------------------------------------------------------------------------------------------------------------------------------------------------------|
| HCV_5UTR_gBlock | ATCGATCGCTCGAGGCCGCTCGTAATACGACTCACTATAGCCAGCCCCCTGAT<br>GGGGGCGACACTCCACCATGAATCACTCCCCTGTGAGGAACTACTGTCTTCAC<br>GCAGAAAGCGTCTAGCCATGGCGTTAGTATGAGTGTCGTGCAGCCTCCAGGA<br>CCCCCCTCCCGGGAGAGCCATAGTGGTCTGCGGAACCGGTGAGTACACCGG<br>AATTGCCAGGACGACCGGGTCCTTTCTTGGATAAACCCGCTCAATGCCTGGAG<br>ATTTGGGCGTGCCCCCGCAAGACTGCTAGCCGAGTAGTGTTGGGTCGCGAAA<br>GGCCTTGTGGTACTGCCTGATAGGGTGCTTGCAGGTGCCCCGGGAGGTCTCG<br>TAGACCGTGCACCATGAGCACGAATCCTAACCTCAAAGAAAAACCAAACGT<br>AACACCAACCGTCGCCACATCTAGAATCGATCG |
| HCVT7F          | GGCCGCTCGTAATACGACTCAC                                                                                                                                                                                                                                                                                                                                                                                                                                                                             |
| HCVT7R          | TGTGGGCGACGGTTGGTGTAC                                                                                                                                                                                                                                                                                                                                                                                                                                                                              |

**Table S1. Sequences of synthetic DNA and oligonucleotides.**
